# Supplementary material for: Chemometric assisted RP-HPLC for fingerprinting of Indian orthodox black tea
Source: Royal Society of Chemistry journal article supplement (doi:10.1039/c3ay41721b), 2014-01-01

**ESM\_1: Chromatogram of withered and fermented leaves: a) withered; b) 50 min fermented; c) 60 min fermented; d) 70 min fermented tea samples**

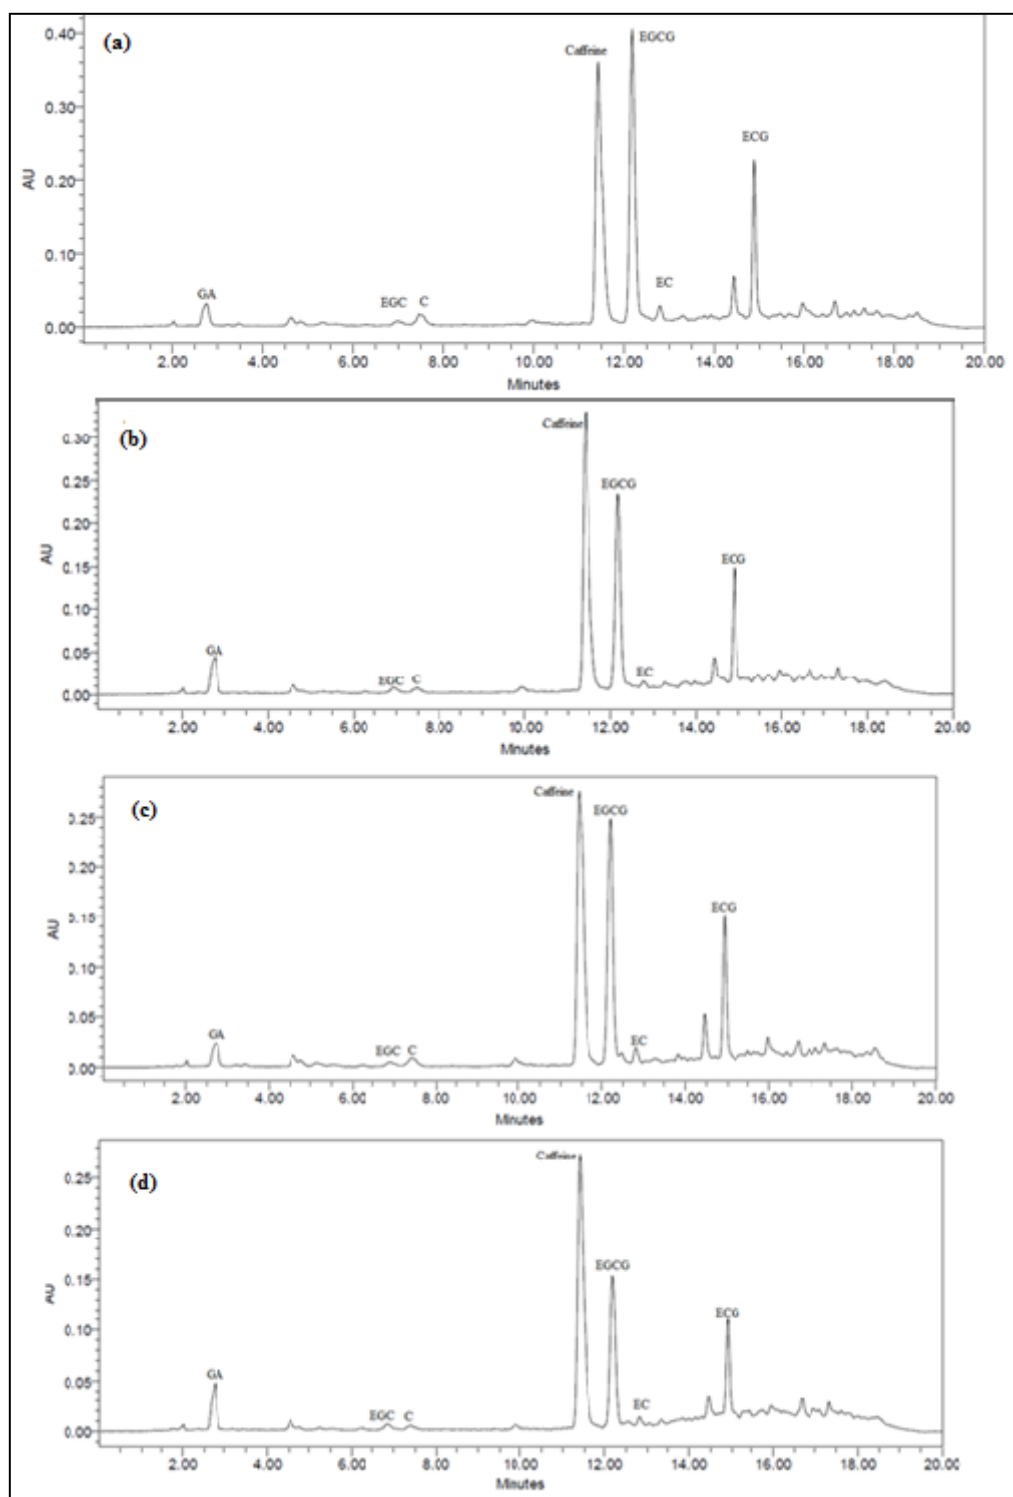

## ESM\_2: Chromatograms for (a) Nilgiri; (b) Kangra; (c) Darjeeling orthodox tea

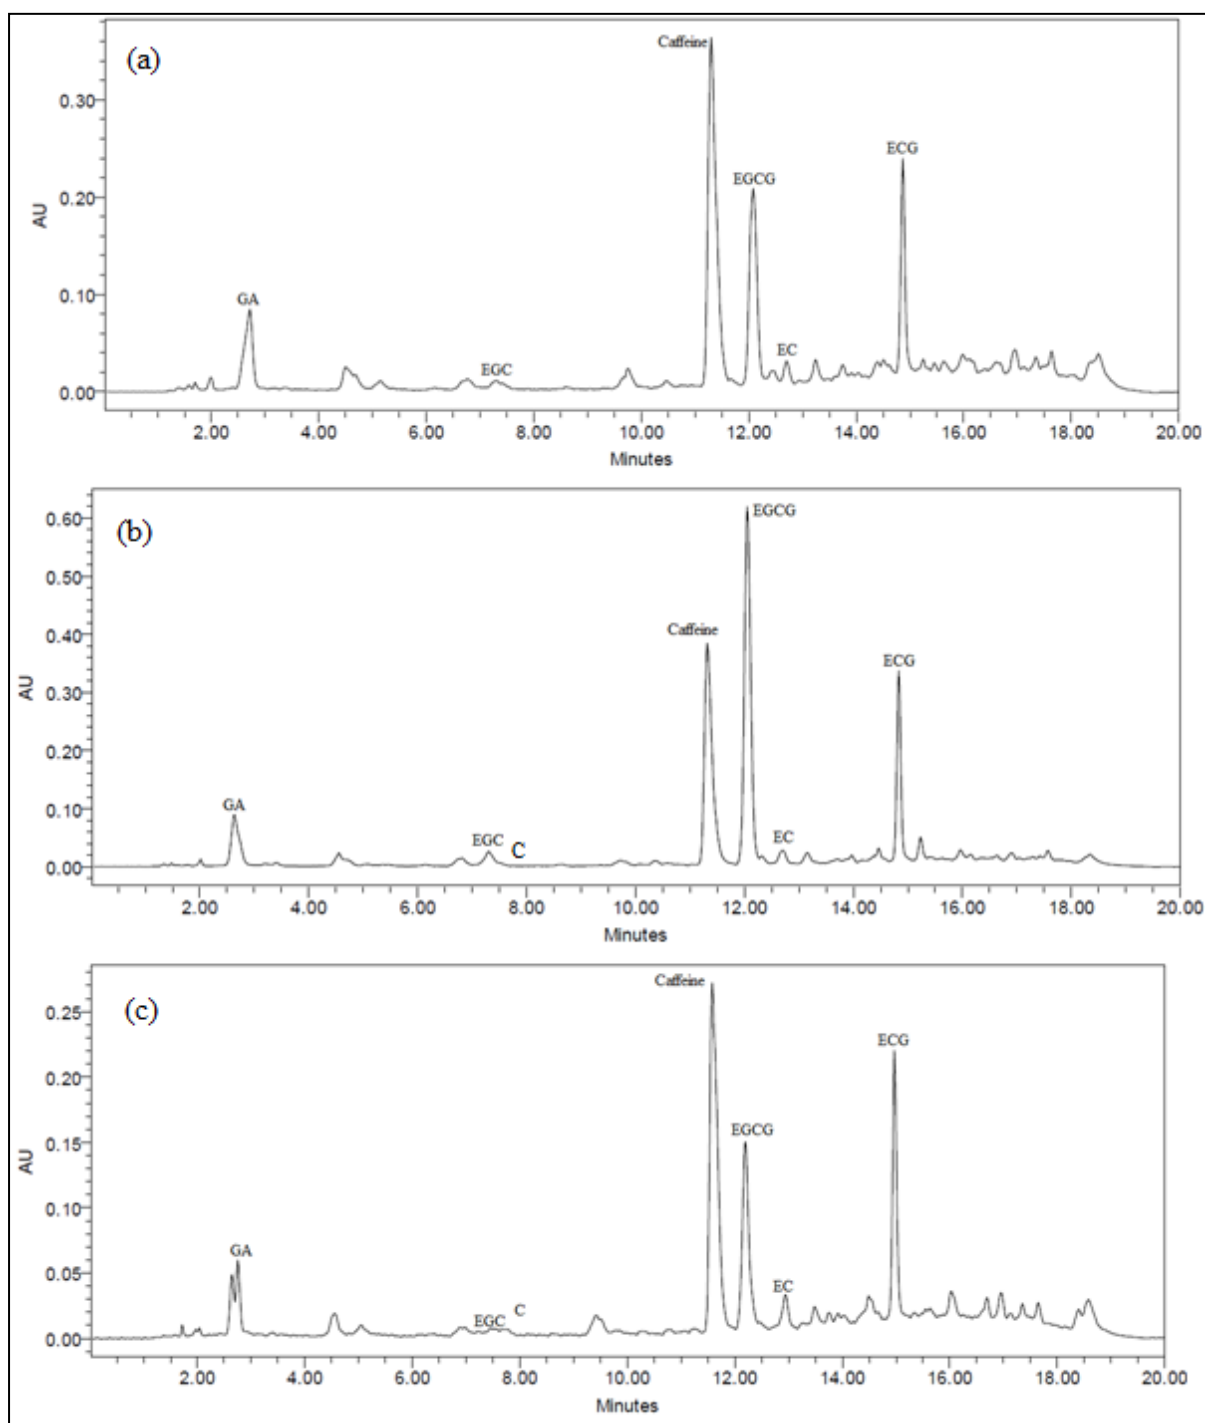

### ESM\_3: Chromatograms showing effect of seasonal variation on leaves

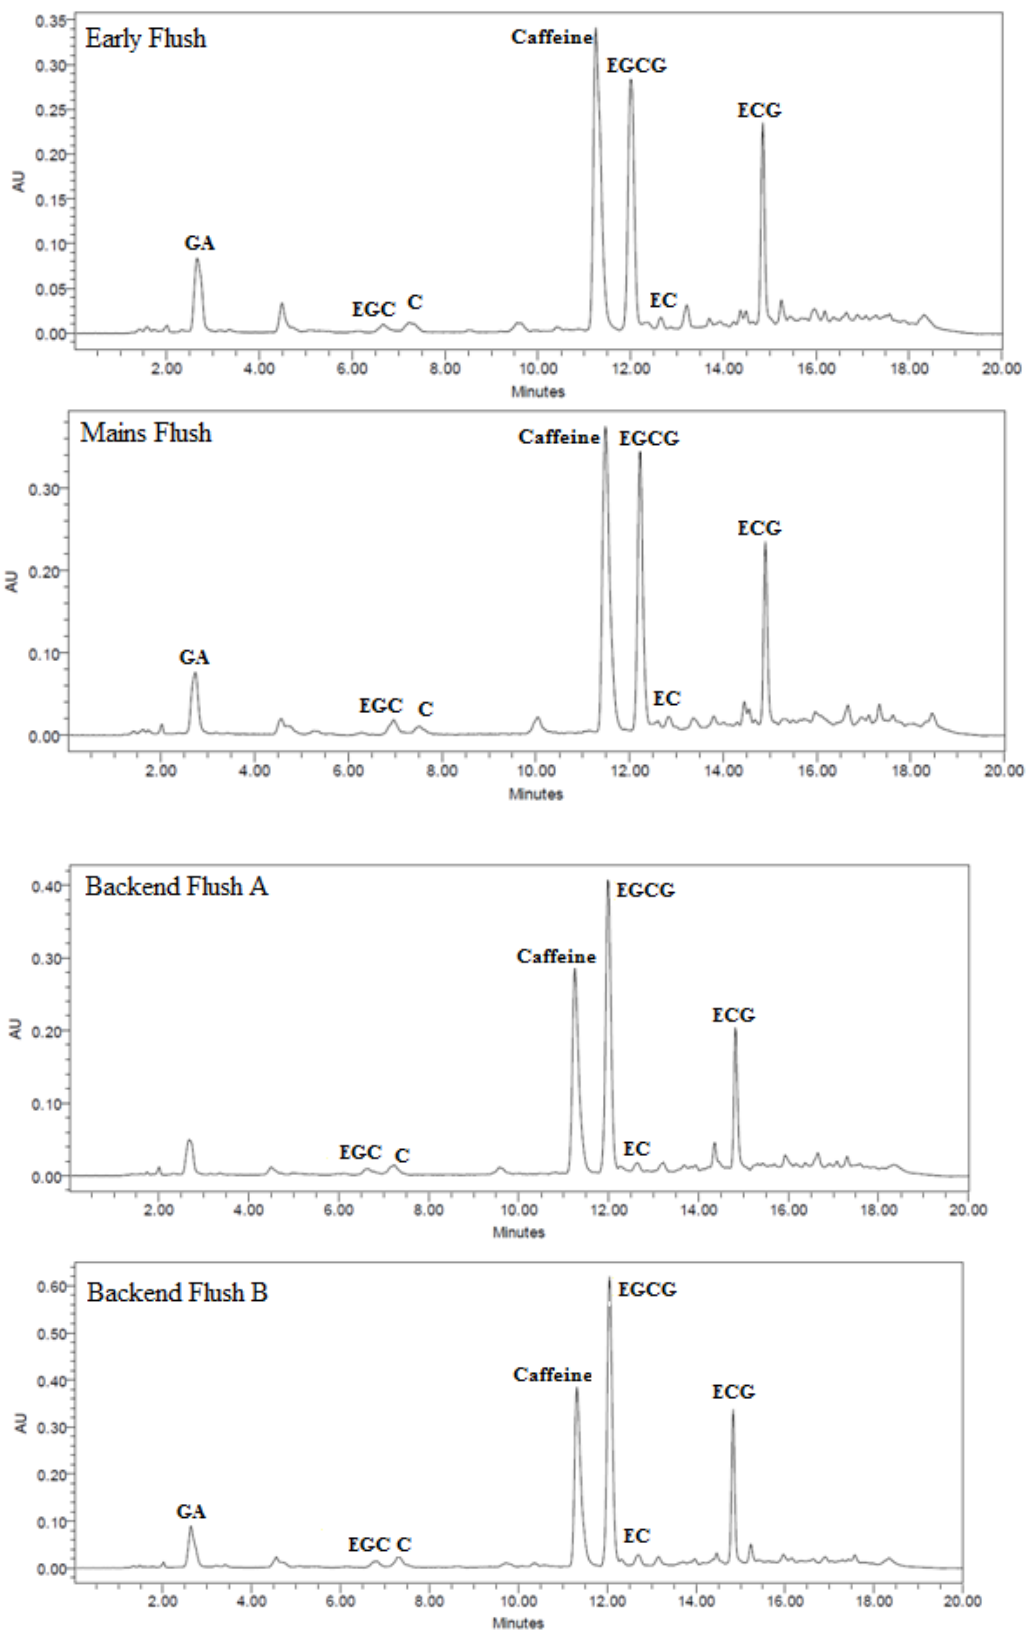

**ESM\_4: HPLC chromatograms of different grades of tea samples; (A) TGBOP,(B) SFTFOP,(C) GOF, (D) FOF, (E) NGBL and (F) NGLL.**

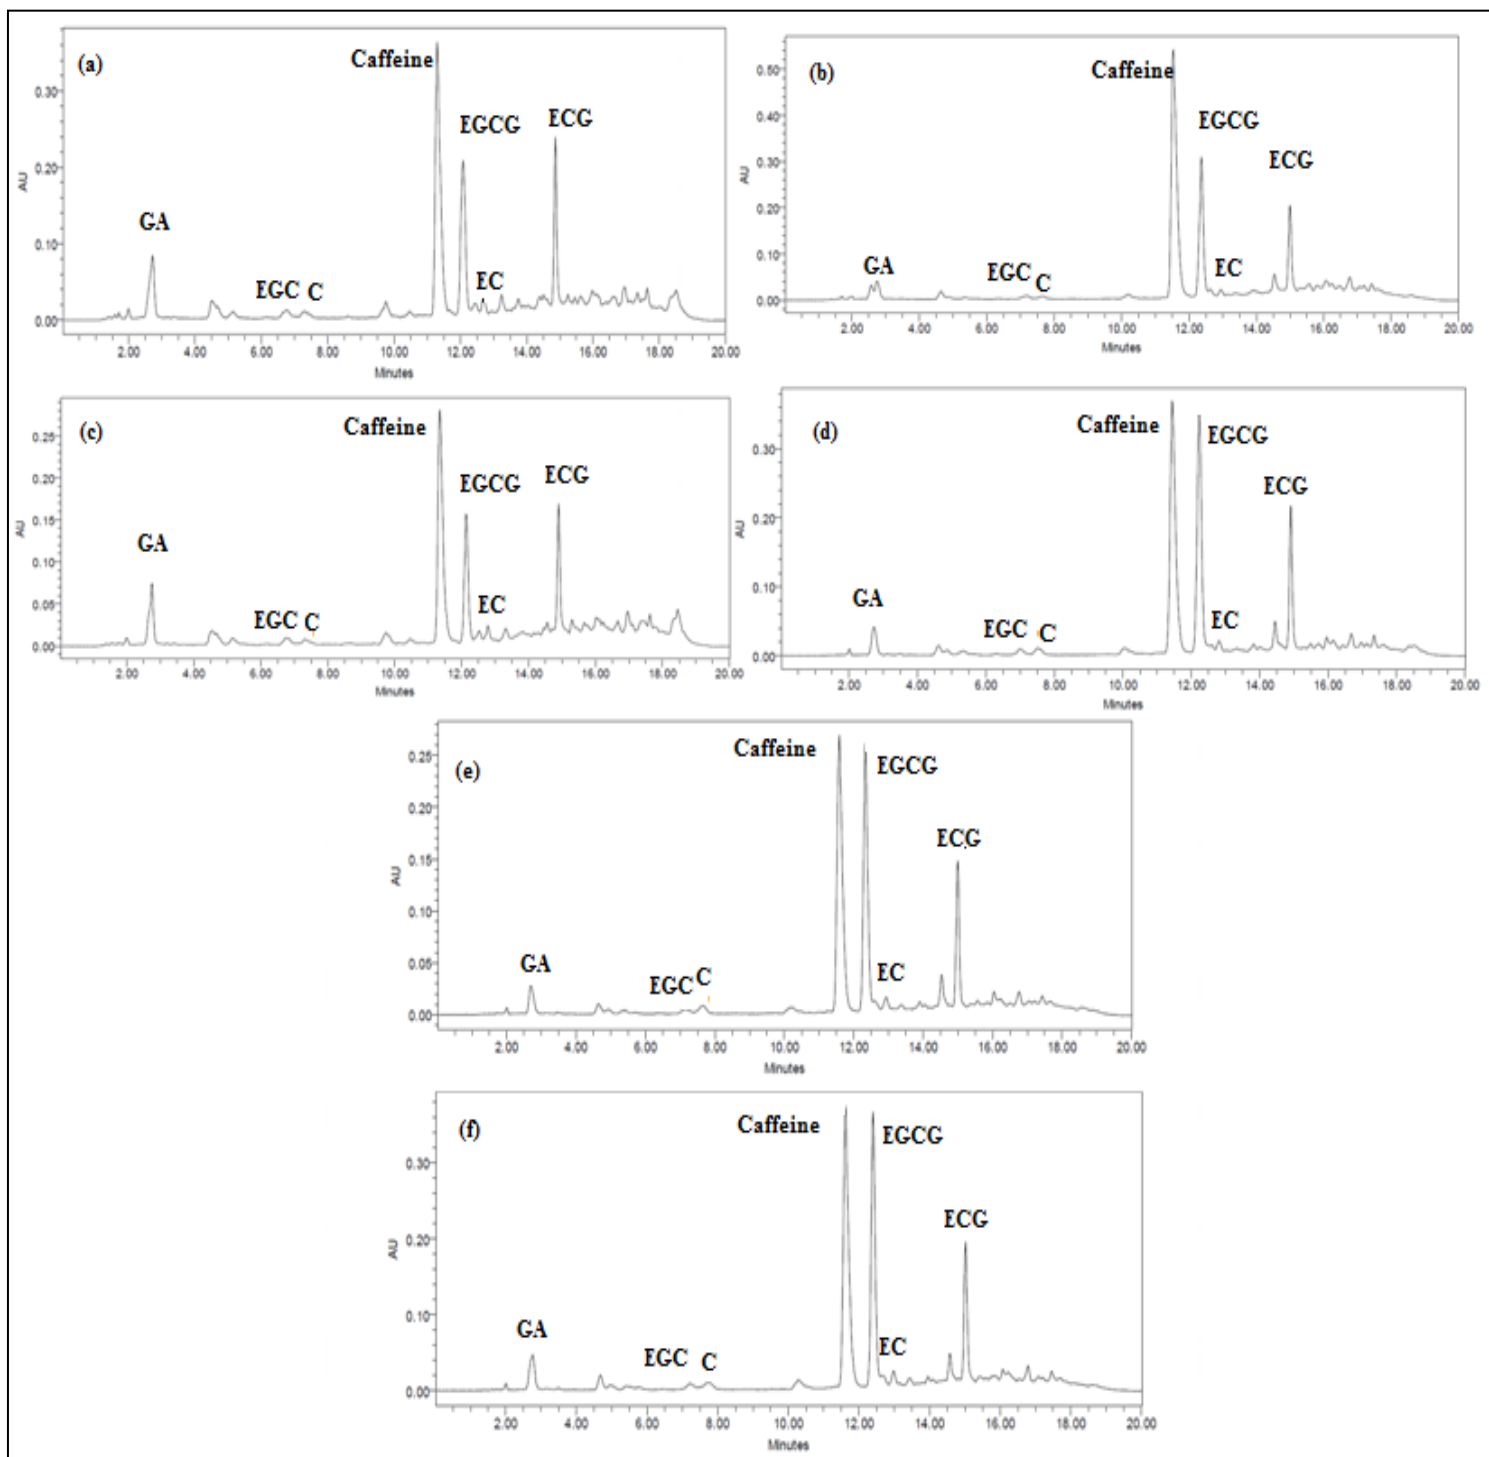

Supplement: c3ay41721b.pdf [file c3ay41721b.pdf]
